# Supplementary material
Source: Research Square preprint supplement (doi:10.21203/rs.3.rs-9706961/v1)
Supplement: Supplementary file 1 [file 14e8955f7943e83a9c24e09e.docx]

File S3: STROBE Statement — Checklist of items that should be included in reports of cross-sectional studies

| **Section/Item** | **Item No.** | **Recommendation** | **Reported on page/line** |
| --- | --- | --- | --- |
| **Title and abstract** |  |  |  |
| Title | 1a | Indicate the study's design with a commonly used term in the title | Page 1, line 1 |
| Abstract | 1b | Provide a structured abstract including background, objectives, methods, results, and conclusions | Page 1, lines 16-32 |
| **Introduction** |  |  |  |
| Background/rationale | 2 | Explain the scientific background and rationale for the investigation being reported | Page 3, lines 1-20 |
| Objectives | 3 | State specific objectives, including any prespecified hypotheses | Page 3, lines 20-23 |
| **Methods** |  |  |  |
| Study design | 4 | Present key elements of study design early in the paper | Page 3, line 25 |
| Setting | 5 | Describe the setting, locations, and relevant dates | Page 3, lines 25-27 |
| Participants | 6 | (a) Give the eligibility criteria, and the sources and methods of selection of participants | Page 3, lines 28-32 |
|  |  | (b) For cross-sectional studies, report the number of participants approached, those who were eligible, and those who participated (response rate) | **Not fully reported — consider adding response rate** |
| Variables | 7 | Clearly define all outcomes, exposures, predictors, potential confounders, and effect modifiers | Page 4, lines 1-5 |
| Data sources/measurement | 8 | For each variable of interest, give sources of data and details of methods of assessment | Page 4, lines 1-5 |
| Bias | 9 | Describe any efforts to address potential sources of bias | **Not explicitly reported — consider adding a sentence** |
| Study size | 10 | Explain how the study size was arrived at | Page 3, lines 33-42 (sample size calculation) |
| Quantitative variables | 11 | Explain how quantitative variables were handled in the analyses | Page 4, lines 6-10 |
| Statistical methods | 12 | (a) Describe all statistical methods, including those used to control for confounding | Page 4, lines 12-14 |
|  |  | (b) Describe any methods used to examine subgroups and interactions | Page 4, lines 12-14 |
|  |  | (c) Explain how missing data were addressed | **Not reported — consider adding** |
| **Results** |  |  |  |
| Participants | 13 | (a) Report numbers of individuals at each stage of study | Page 4, line 17 |
|  |  | (b) Give reasons for non-participation at each stage | Page 3, lines 41-42 |
|  |  | (c) Consider use of a flow diagram | **Not provided** |
| Descriptive data | 14 | (a) Give characteristics of study participants (e.g., demographic, clinical, social) | Table 1, Page 5 |
|  |  | (b) Indicate number of participants with missing data for each variable | Table 1 note, Page 6 |
| Outcome data | 15 | Report numbers of outcome events or summary measures | Page 6, line 1; Figure 1 |
| Main results | 16 | (a) Give unadjusted estimates and, if applicable, confounder-adjusted estimates | Tables 2 and 3, Pages 7-9 |
|  |  | (b) Report category boundaries when continuous variables were categorized | Table 1, Page 5 |
|  |  | (c) Consider translation of estimates of relative risk into absolute risk for a meaningful time period | **Not applicable (cross-sectional)** |
| Other analyses | 17 | Report other analyses done—e.g., analyses of subgroups and interactions | Tables 2 and 3, Pages 7-9 |
| **Discussion** |  |  |  |
| Key results | 18 | Summarize key results with reference to study objectives | Page 10, lines 1-4 |
| Limitations | 19 | Discuss limitations of the study, taking into account sources of potential bias or imprecision | Page 12, lines 15-20 |
| Interpretation | 20 | Give a cautious overall interpretation of results considering objectives, limitations, and multiplicity of analyses | Page 12, lines 21-25 |
| Generalizability | 21 | Discuss the generalizability (external validity) of the study results | Page 12, lines 25-27 |
| **Other information** |  |  |  |
| Funding | 22 | Give the source of funding and the role of the funders | Page 14, lines 1-3 |

**Note: This checklist is based on the STROBE Statement for cross-sectional studies. Items marked in* ***bold*** *require attention before final submission.**
