# Supplementary material
Source: Research Square preprint supplement (doi:10.21203/rs.3.rs-9706961/v1)
Supplement: Supplementary file 2 [file 71d7b1d6dd0894d941c7b965.docx]

File S2: Informed Consent Form

**Study Title:** Prevalence of Depression Among Infertile Women in Aden, Yemen: A Cross-Sectional Study

**Principal Investigator:** Dr. Ali N. M. Gubran

**Affiliation:** Department of Health Sciences, Faculty of Medicine and Health Sciences, University of Science and Technology, Aden, Yemen

**Contact Information:** a.Alyafei@aden.ust.edu

__________________________________________________

# Part 1: Information Sheet

## Introduction

You are invited to participate in a research study conducted by researchers from the University of Science and Technology, Aden, Yemen. This form provides you with information about the study. Please read it carefully before deciding whether to participate.

## Purpose of the Study

The purpose of this study is to determine the prevalence of depression and its severity among infertile women attending infertility centers and clinics in Aden, Yemen.

## Study Procedures

If you agree to participate, you will be asked to:

- Answer a structured questionnaire that includes questions about your socio-demographic information, infertility history, and general health status.
- Complete the Patient Health Questionnaire-9 (PHQ-9), which contains 9 questions about your mood and feelings over the past two weeks.

The interview will take approximately 15–20 minutes of your time.

## Risks and Discomforts

There are no physical risks associated with this study. Some questions may cause mild emotional discomfort as they ask about personal feelings. You may skip any question you do not wish to answer.

## Benefits

There are no direct personal benefits from participating in this study. However, your participation will help researchers understand the mental health needs of infertile women in Yemen and may contribute to improving future healthcare services.

## Confidentiality

All information collected will be kept strictly confidential. Your name will not appear on any questionnaire. Data will be stored securely and accessed only by the research team. Results will be published in aggregate form only, with no individual identification.

## Voluntary Participation

Your participation in this study is entirely voluntary. You have the right to refuse to participate or to withdraw from the study at any time without giving any reason and without any negative consequences to your medical care or legal rights.

## Right to Ask Questions

You may ask any questions about the study before deciding to participate or at any time during the study. Please contact Dr. Ali Gubran at a.Alyafei@aden.ust.edu.

__________________________________________________

# Part 2: Certificate of Consent

I have read the above information (or it has been read to me). I have had the opportunity to ask questions, and any questions I have asked have been answered to my satisfaction. I understand that my participation is voluntary and that I am free to withdraw at any time without giving a reason.

I agree to take part in this study.

## Participant Information

| Full name (optional): | _________________ |
| --- | --- |
| Signature or thumbprint: | _________________ |
| Date: | _________________ (DD/MM/YYYY) |

## Researcher Information

| Name of interviewer: | _________________ |
| --- | --- |
| Signature: | _________________ |
| Date: | _________________ (DD/MM/YYYY) |

__________________________________________________

### For participants who cannot read or write:

I have witnessed the accurate reading of the consent form to the participant, and the participant has had the opportunity to ask questions. The participant has given consent freely.

| Name of witness: | _________________ |
| --- | --- |
| Signature of witness: | _________________ |
| Date: | _________________ (DD/MM/YYYY) |
