# Supplementary material
Source: Research Square preprint supplement (doi:10.21203/rs.3.rs-9706961/v1)
Supplement: Supplementary file 3 [file 7c640f6dcbbc0e0e03edd355.docx]

File S1: Structured Questionnaire for Data Collection

# Section A: Socio-demographic Information

Instructions: Please answer the following questions by ticking (✓) the appropriate box or writing in the space provided.

1. Age: _______ years

2. Marital status:

- [ ] Married

- [ ] Divorced

- [ ] Widowed

3. Education level:

- [ ] Illiterate

- [ ] Primary school

- [ ] Secondary school

- [ ] University or higher

4. Residence:

- [ ] Urban

- [ ] Rural

5. Occupation:

- [ ] Housewife

- [ ] Daily laborer

- [ ] Employed (government or private)

- [ ] Other (please specify): ___________

6. Monthly family income:

- [ ] Low (less than 50,000 YER)

- [ ] Medium (50,000 – 150,000 YER)

- [ ] High (more than 150,000 YER)

# Section B: Infertility-related Information

7. Duration of infertility: _______ years

8. Are you currently receiving treatment for infertility?

- [ ] Yes

- [ ] No

9. Have you reached menopause?

- [ ] Yes

- [ ] No

# Section C: General Health and Lifestyle

10. Do you practice any regular physical activity or sport?

- [ ] Yes

- [ ] No

11. Do you smoke cigarettes or use any tobacco products?

- [ ] Yes

- [ ] No

12. Do you have any chronic disease (e.g., diabetes, hypertension, thyroid disorders, cancer, etc.)?

- [ ] Yes (please specify): ___________

- [ ] No

# Section D: Patient Health Questionnaire-9 (PHQ-9)

Instructions: Over the last 2 weeks, how often have you been bothered by any of the following problems? Please tick (✓) the appropriate box for each item.

| Item | Not at all (0) | Several days (1) | More than half the days (2) | Nearly every day (3) |
| --- | --- | --- | --- | --- |
| 1. Little interest or pleasure in doing things | [ ] | [ ] | [ ] | [ ] |
| 2. Feeling down, depressed, or hopeless | [ ] | [ ] | [ ] | [ ] |
| 3. Trouble falling or staying asleep, or sleeping too much | [ ] | [ ] | [ ] | [ ] |
| 4. Feeling tired or having little energy | [ ] | [ ] | [ ] | [ ] |
| 5. Poor appetite or overeating | [ ] | [ ] | [ ] | [ ] |
| 6. Feeling bad about yourself — or that you are a failure or have let yourself or your family down | [ ] | [ ] | [ ] | [ ] |
| 7. Trouble concentrating on things, such as reading the newspaper or watching television | [ ] | [ ] | [ ] | [ ] |
| 8. Moving or speaking so slowly that other people could have noticed? Or the opposite — being so fidgety or restless that you have been moving around a lot more than usual | [ ] | [ ] | [ ] | [ ] |
| 9. Thoughts that you would be better off dead or of hurting yourself in some way | [ ] | [ ] | [ ] | [ ] |

Scoring: Total score = sum of all items (range 0–27)

- 0–4: No depression

- 5–9: Mild depression

- 10–14: Moderate depression

- 15–19: Moderately severe depression

- 20–27: Severe depression

Thank you for your participation.
