# Supplementary material
Source: Research Square preprint supplement (doi:10.21203/rs.3.rs-9706961/v1)
Supplement: Supplementary file 4 [file 843e2771f69acf423fdb8d5f.docx]

The sample size was calculated using the standard formula for cross-sectional studies:

n = Z² × p(1-p) / d²

Where:

- n = required sample size

- Z = standard normal value at 95% confidence level (1.96)

- p = estimated prevalence of depression among infertile women (0.538 based on a study from Saudi Arabia [23])

- d = margin of error (0.09)

The calculation was performed as follows:

(1.96)² × 0.538 × (1 - 0.538) / (0.09)² = 3.8416 × 0.538 × 0.462 / 0.0081 = 0.954 / 0.0081 = 117.8 ≈ 118 women.

After adding a 10% non-response rate, the target sample size was 130 women. However, due to time constraints, limited accessibility of participants, and non-response during data collection, a total of 101 infertile women were eventually enrolled. Of 130 eligible infertile women approached, 101 agreed to participate, yielding a response rate of 77.7%.
